1 **Nomogram-Based Prognostic Model to predict the High blood pressure in**  
2 **Children and Adolescents —— Finding from 342,736 individual in China**

3 Jing-hong Liang<sup>a</sup>; Yu Zhao<sup>a</sup>; Yi-can Chen<sup>a</sup>; Shan Huang<sup>a</sup>; Shu-xin Zhang<sup>a</sup>; Nan Jiang<sup>a</sup>;  
4 Aerziguli Kakaer<sup>a</sup>; Ya-jun Chen<sup>a\*</sup>.

5

6 **Author Affiliations:**

7 <sup>a</sup> Department of Maternal and Child Health, School of Public Health, Sun Yat-sen  
8 University, Guangzhou 510080, P. R. China.

9

10 **E-mail:**

11 Jing-hong Liang, [liangjh78@mail2.sysu.edu.cn](mailto:liangjh78@mail2.sysu.edu.cn);  
12 Yu Zhao, [zhaoy369@mail2.sysu.edu.cn](mailto:zhaoy369@mail2.sysu.edu.cn);  
13 Yi-can Chen, [chenyc55@mail2.sysu.edu.cn](mailto:chenyc55@mail2.sysu.edu.cn);  
14 Shan Huang, [huangsh59@mail2.sysu.edu.cn](mailto:huangsh59@mail2.sysu.edu.cn);  
15 Nan Jiang, [jiangn63@mail2.sysu.edu.cn](mailto:jiangn63@mail2.sysu.edu.cn);  
16 Shu-xin Zhang, [zhangshx26@mail2.sysu.edu.cn](mailto:zhangshx26@mail2.sysu.edu.cn);  
17 Aerziguli Kakaer, [aezglkke@mail2.sysu.edu.cn](mailto:aezglkke@mail2.sysu.edu.cn).

18

19 **\*Corresponding Author:**

20 Ya-jun Chen, MD,  
21 School of public Health, Medical College of Sun Yat-Sen University,  
22 No.74 Zhongshan 2nd Road, Yuexiu District, Guangzhou, China 510080.  
23 (E-mail: [chenyj68@mail.sysu.edu.cn](mailto:chenyj68@mail.sysu.edu.cn))

24

25 **Funding Sources:** The work was supported by the National Natural Science  
26 Foundation of China (No. 81673193).

27

28 **Abstract**

29 **Background** Predicting the potential risk factors of High blood pressure(HBP) among

30 **NOTE:** This preprint reports new research that has not been certified by peer review and should not be used to guide clinical practice.  
children and adolescents is still a knowledge gap. Our study aimed to establish and

31 validate a nomogram-based model for identifying children and adolescents at risk of  
32 developing HBP based on a population-based prospective study.

33 **Methods** Hypertension was defined as systolic blood pressure or diastolic blood  
34 pressure above 95<sup>th</sup> percentile, using age, gender and height-specific cut-points.  
35 Penalized regression with Lasso was used to identify the strongest predictors of  
36 hypertension. Internal validation was conducted by 5-fold cross-validation and  
37 bootstrapping approach. The predictive variables were identified along with the  
38 advanced nomogram plot by conducting univariate and multivariate logistic regression  
39 analyses. A nomogram was constructed by training group comprised of  
40 239,546(69.89%)participants and subsequently validated by externally group with  
41 103,190(30.11%)participants.

42 **Results** Of 342,736 children and adolescents, a total of 55,480(16.19%) youths were  
43 identified with HBP with mean age  $11.51 \pm 1.45$  year and 183,487 were boys(53.5%).  
44 Nine significant relevant predictors were identified including: age, gender, weight  
45 status, birthweight, breastfeeding, gestational hypertension, family history of obesity,  
46 family history of hypertension and physical activity. An acceptable discrimination[Area  
47 under the receiver operating characteristic curve(AUC):0.742(Development group),  
48 0.740(Validation group)] and good calibration(Hosmer and Lemeshow statistics,  $P >$   
49 0.05) were observed in our models. An available web-based nomogram was built online.

50 **Conclusions** This model composed of age, gender, early life factors, family history of  
51 disease, and lifestyle factors may predict the risk of HBP among children and  
52 adolescents, which has developed a promising nomogram that may aid in more  
53 accurately for identifying the HBP among youths in primary care.

54 **Funding Sources:** The work was supported by the National Natural Science  
55 Foundation of China (No. 81673193).

56

57 **Keywords:** Risk classification, Nomograms, Children and adolescents, High blood  
58 pressure.

59

60

## 61 **Introduction**

62 High blood pressure(HBP) whether in primary or secondary, were occur with 2-3%  
63 incidence in the general children(Chiolero, Cachat, Burnier, Paccaud, & Bovet, 2007;  
64 McNiece et al., 2007) and deemed as the most common and potentially reversible  
65 early marker for the development of metabolic diseases, neurological disorders,  
66 persistent of hypertension in adulthood, cardiovascular disease in particular(Lauer,  
67 Anderson, Beaglehole, & Burns, 1984; Rosner, Cook, Daniels, & Falkner, 2013),  
68 which contributing not only to global burden but also a major cause of poorer  
69 disability-adjusted life-years both for youth and adults(Collaborators, 2017; Lim et  
70 al., 2012). Of note, compared with female, male tend to have a higher proportion of  
71 arterial hypertension among 18 years old adolescents with the ratio of male to female  
72 (3-4:1)(Rosner et al., 2013). However, there are 74% children with various  
73 documented were high Blood Pressure(BP) have been underrecognized as  
74 hypertensive(Hansen et al., 2007), which likely owing to are not fully understand but  
75 are likely due to the asymptomatic presentation of hypertension, challenging patient  
76 assessments, complicated BP norms, and unclear recommendations.

77 Given the increasing evidence base, recommendations of identification as respect  
78 of BP in children from multiple guidelines vary somewhat(J. M. D. A et al., 2017;  
79 Dionne et al., 2016; Empar et al., 2016; None, 2017), probably attribute to differences  
80 on their region, sample size and other extrapolation of their evidence. Based on the  
81 pediatric researches, it is essential to identify inherent and exterior predictors may  
82 provide the comprehensive strategies for unraveling the pathogenesis of hypertension  
83 at individuals' early stage.

84 And another concern is that the present studies yielded contradictory results on  
85 the risk factors for HBP in children. For example, some study indicate that children  
86 exposure to smoking were more likely associated with an increased risk of HBP  
87 whether in active or passive smoking(Katona et al., 2011; Kollias et al., 2009;  
88 Simonetti et al., 2011) while some reported an inconsistent evidence(Giussani,  
89 Antolini, Brambilla, Pagani, & Genovesi, 2013; Roya et al., 2016), and the meta-  
90 analysis has produced the unconvincing available evidence with the relatively low-

91 quality epidemiologic studies(Aryanpur et al., 2019). Furthermore, previous  
92 predictive model remains inconsistent. A study performed in Switzerland identified a  
93 higher proportion of children with HBP (65%) based on the child overweight and  
94 parental HBP than another strategy in accordance with child overweight  
95 only(43%)(Bloetzer et al., 2015; Hamoen, Welten, Nieboer, Heymans, & Wang,  
96 2020). Thus, a more plausible model to target screening for children and adolescents  
97 with HBP need to be properly addressed.

98 Consequently, in this study, based on the ongoing successive sectional study  
99 conducted in Guangzhou[(Guangzhou Survey on Students' Constitution and Health),  
100 GSSCH] in 2020 with total of 1,594,048 participants, our study is aiming at assess the  
101 association of numerous prediction and hypertension and, to first ever build a  
102 nomogram statistical tool to identify the precise long-term effect modifiers of HBP in  
103 children and adolescents both by developing and internal validating the dataset  
104 established in 2020.

105

## 106 **Results**

### 107 **Demographic characteristics**

108 As displayed in **Supplementary Figure.1**, based on the several screening criteria, after  
109 exclusions, a total of 342,736 participants were identified. 69.89%(N=239,546)students  
110 were randomly assigned to the derivation group and 30.11%( N=103,190)to the internal  
111 validation group. Of the development group, the average age of children and  
112 adolescents was 11.51 years(2.73) with range from 6 to 18, and 11.51 years (2.74) with  
113 range from 7 to 18 in validation group. More than half of the children were boys (53.5%,  
114 n=183,487). Of 342,736 participants, 287,256(83.81%) and 55,480(16.19%) children  
115 were identified as having HBP and non-HBP, respectively.

116 There was existing a statistically significant difference among the majority of  
117 demographic variables in either the HBP group and non- HBP group( $P < 0.001$ ), such  
118 as age, gender, birthweight and so on. We only found no significant differences in one  
119 parental education level. The demographic characteristics of the subjects was listed in

120 **Table.1.**

121 The prevalence of HBP was 16.19%[Development group:16.20%(n=38,807),  
122 Validation group: 16.16%(n=16,673)] judged by the 95<sup>th</sup> percentile for gender, age and  
123 height. The mean SBP and DBP were  $104.10 \pm 10.17$  mmHg and  $64.95 \pm 6.88$  mmHg  
124 in total participants, respectively.

125

### 126 **Multivariable predictors of hypertension**

127 According to the pre-establish preoperative variables evaluated, Lasso regression was  
128 showed that there are 14 candidate predictors including age, gender, birthweight, weight  
129 status, feeding mode, gestational hypertension, parental smoking status, parental  
130 education, family history of obesity, family history of hypertension, household monthly  
131 income, average outdoor physical activity time, average screen-based time and fried  
132 food intake with a high correlated in the incidence of HBP for children and adolescents  
133 (Shown in **Figure.3**), while there are only 9 of them(age, gender, birthweight, weight  
134 status, feeding mode, gestational hypertension, family history of obesity, family history  
135 of hypertension and average outdoor physical activity time) were independently  
136 associated with a higher probability of HBP after the backward elimination procedure  
137 of multivariable logistic analysis. **Table.2** shows the results of multivariable predictors.

138 The nomogram plot based on all the 9 independently predictors calculated by the  
139 generalized linear models was depicted in **Figure.1** with single score of each predictor  
140 which contribute to a total score for predicting HBP. The discrimination of model as  
141 per the above 9 significantly risk factors were detected by the apparent C-statistic for  
142 the model with value of 0.742 in development group and 0.740 in validation  
143 group(Shown in **Figure.2**). With the model included all the 14 candidate factors, the  
144 AUC were 0.744 and 0.741 in development and validation group, respectively(Shown  
145 in **Supplementary Figure.2**). All of which mentioned above tests were indicated good  
146 discrimination, which shown in **Figure.2**. The Decision curve analysis(DCA) which  
147 presented in **Supplementary Figure.3** was further suggest that our nomogram yielded  
148 a high clinical net benefit, which is of great value for accurate individualized  
149 measurement of the incidence of hypertension among children and adolescents.

150

151 **Website of nomogram**

152 An available web-based nomogram calculator of HBP was built to present the  
153 diagnostic probability for helping guardians and physicians to identify the HBP among  
154 children and adolescents in a user-friendly way.

155

156 **Discussion**

157 As the high potential hazard predictors reported previously, age, gender, birthweight,  
158 feeding mode, gestational hypertension, weight status, family history of obesity, family  
159 history of hypertension and frequency of PA were also be found and presented as a  
160 simple and reliable nomogram plot which designed for identifying the children and  
161 adolescents who were at high risk of developing HBP.

162 Accumulating evidence supports the view that the roots contribution of essential  
163 hypertension extends back to childhood and adolescence(Cosenzi, S Ac Erdote, Bocin,  
164 Molino, & Bellini, 1996; Kawabe et al., 2000). Targeted identifying the risk factors of  
165 developing HBP in children and adolescents may be practicable to avoid unnecessary  
166 burden, overdiagnosis or costs. Our study provides a more interpretability, more precise  
167 classification standard for HBP in youths, instead of using complicated model to predict  
168 HBP.

169 The strongest risk factor for primary HBP in children and adolescents is elevated  
170 body mass index(Giussani et al., 2013), which was also demonstrated in our study. A  
171 higher prevalence in children with HBP who were classified as overweight, was  
172 observed in the comprehensive meta-analysis(Song, Zhang, Yu, Zha, & Rudan, 2019).  
173 Similar prevalence values were also noted in previous studies conducted in American  
174 and European suggest that the incidence of HBP among children and adolescents with  
175 obesity had significantly increased compared to the non-obese children(Chiolero et al.,  
176 2007; Kaelber et al., 2016). There are several known pathophysiological pathways by  
177 which obesity may lead to an elevated BP and HBP. A central tent for HBP is that  
178 dysfunctional adipocyte and neurohormonal activation of the sympathetic nervous  
179 system(SNS). Increased SNS activity can leads to elevated BP and HBP by increasing  
180 renin–angiotensin–aldosterone system (RAAS) activity in addition to the direct

181 vasoconstricting effects of SNS. RAAS activity increases BP directly (angiotensin II-  
182 mediated vasoconstriction and further SNS activation) and indirectly (angiotensin II-  
183 and aldosterone-mediated salt and water tubular reabsorption and ADH-mediated water  
184 retention)(Brady, 2017; Lagos et al., 2016). Additionally, because of that kidney would  
185 become fat encapsulated with the obsess state, there is increased renal interstitial fluid  
186 pressure and slower tubular flow rates which ultimately leads to increased sodium  
187 reabsorption and increased intravascular volume(Ouchi, Parker, Lugus, & Walsh),  
188 which may cause the hypertension occurs. Evidence is accumulating that factors during  
189 early-life stage have long-term effects on later BP in childhood and young  
190 adulthood(Barker & Djg, 2010; Cohen & Meryl, 2004). As the indicator operating early  
191 in life, history of low or high birthweight(birthweight < 2500g or > 4000g) seemed  
192 lead to be associated with a higher risk of HBP(Bergvall, Iliadou, Tuvemo, &  
193 Cnattingius, 2005; Gansäuer, Rosales, & Justicia, 2005). Nevertheless, some studies  
194 did not support this association(Daly, Scragg, Schaaf, & Metcalf, 2005). With regard  
195 another modifiable environmental factors, previous studies that corroborated the  
196 protective role of breastfeeding on BP later in life(Kelishadi et al., 2006; Martin & R,  
197 2005), on the contrary, our model indicate that compared with breastfeeding mode,  
198 partial breastfeeding may play a protective role while bottle feeding may considered to  
199 be risk role to individuals, another meta-analysis indicate that any effect of  
200 breastfeeding on BP is modest with limited public health importance may partly  
201 attribute to the publication bias(Owen et al., 2003). Notwithstanding the early-life  
202 factors were possible associations with increased risk for HBP among youths is  
203 inconclusive, their long-term efficacy raises concerns and further investigation are  
204 desirable.

205 Our findings, which were consistent with majority of studies, revealed that other  
206 risk factors were increased the risk of HBP, which including male sex, and family  
207 history of hypertension, as well as insufficient of exercise(Hamoen et al., 2020; Li,  
208 Sun, Liu, Li, & Zhou, 2019; Moyer & Virginia, 2013). Our model shows that lower  
209 levels of PA is correlated with higher risk of HBP, and other studies have commonly  
210 shown a beneficial role of PA for youths with HBP(Strong et al., 2005). Moreover, our

211 finding also suggested that an excess of Sedentary behavior time(SBT) is associated  
212 with an increased risk of hypertension compared to the recommended levels of SBT.  
213 Overall, efforts to encourage youths increase their PA, and reduce their time of SBT  
214 are warranted. For fried food intake, based on the initial regression shrinkage and  
215 selection of Lasso, there were no statistically significant differences in youths for  
216 hypertension. This discrepancy could be linked to the fact that salt intake in this study  
217 did not include due to the lack of data, even though we use fried food instead of salt  
218 intake roughly.

219 Previous studies using a similar methodology supported the hypothesis that  
220 age, gender, birthweight, family history of HBP and other predictors may account for  
221 the high prevalence of HBP during childhood and adolescence. Nevertheless, other  
222 models suggested that child ethnicity, environmental and genetic risk factors play  
223 critical roles in onset and progression of HBP(Ataei et al., 2004; Hamoen et al.,  
224 2020). It should be noted that the regional differences, eating habits and differences  
225 morphometric characteristic can explain the dissimilar findings between studies(El-  
226 Shafie, El-Gendy, Allhony, Fotoh, & Galab, 2018). Of the examined risk factors, both  
227 age and gender are important contributions to the progression of HBP, and may be  
228 more significant if other modifiable risk factors were involved in their life, which is  
229 particularly true for essential hypertension(Antal et al., 2004). Since dichotomization  
230 of continuous variables may cause loss of valuable information(Royston, Altman, &  
231 Sauerbrei, 2005; Steyerberg & Vergouwe, 2014), we have categorized continuous  
232 predictors such as PA and SBT, especially weight status(BMI), because of normal  
233 changes in BMI that occur as children age(Giussani et al., 2013).

234 To date, our study has established a quantitative nomogram for the first time in the  
235 form of a concise, more practical, policy-making orientation, HBP nomogram for  
236 children that not only useful for clinicians, public health practitioners and  
237 policymaker in the developed countries to address this global health need among  
238 various indications but also, and perhaps more importance, for those in the low-  
239 income countries. In the point of macro-view, identifying the HBP predictors for  
240 youths would not only relieving the burden of monitor and administer on youth



241 health, but also for economizing the facilities and resources. Furthermore, such  
242 identifications can help introducing earlier interventions for those at risk, which  
243 include, but are not limited to, help children disengage themselves from the concern  
244 of diseases early as possible, and prevent the transfer to other potential hazards such  
245 as adverse cardiovascular outcomes. In the methodological point of view, numerous  
246 selective variables were incorporate into a comprehensive instrument for the  
247 prediction of the probability of new high blood disorder among youth. Summary  
248 variables selected were based on the individuals' demographic characteristics, family  
249 history, physical examination and lifestyle-associated factors. To improved approach  
250 avoided the concerns of model overfitting, the predictive value of the nomogram is  
251 easy to handle, which was evaluated based on highly discrimination, calibration, and  
252 clinical utility in separate internal training and validation datasets. One recent  
253 publication has developed and validated a risk prediction model for screening the  
254 hypertension among Chinese adults(Deng et al., 2021). Targeting on the large-scale  
255 study on youth population, our study suggest that 9 predictors are significantly  
256 associated with HBP among youths. All predictors are readily available in routine  
257 physical examinations and easily measured by individuals themselves, which means  
258 the established model in our study represent a possibly useful instrument for rapid  
259 assessment of hypertension among children and adolescents compared with the  
260 former model. Furthermore, our study has more advantages than another prediction  
261 model based on the youth population with a higher discrimination, larger sample size  
262 and more selective candidates for estimating simultaneously(Hamoen et al., 2020).

263 However, several limitations exist in the present study. We developed a nomogram  
264 model for estimating the risk of HBP while validated it with an internal assessment  
265 dataset. The incidence of HBP (16.9%) in our study was higher than the reported  
266 incidence in the general youths(4.0%)(Song et al., 2019), which may have biased our  
267 results. More characteristics of patients and variables should be established and  
268 extracted to improve the capacity of predicting prognosis in youths with HBP, both  
269 genetic and environmental determinants are likely to be responsible for the HBP  
270 occurs(Li et al., 2019).

271

## 272 **Conclusion**

273 In this study, a feasible nomogram was derived from the ongoing study to visually  
274 predict the probability of HBP in children and adolescents for clinicians, policy-maker  
275 even the family members on enhancement of the screening and subsequent diagnosis.

276

## 277 **Methods**

### 278 **Study population and Data collection**

279 The survey is not publicly available and participants were protected under a certificate  
280 of confidentiality issued by the Government of Guangzhou due to the sensitivity nature  
281 of data collected from all students group in Guangzhou city.

282 Our study was performed in accordance with the Strengthening the Reporting of  
283 Observational Studies in Epidemiology(STROBE) reporting guideline(Von, Altman, &  
284 Egger, 2007). Relevant information was collected from all participants' parents or their  
285 legal guardians gave written informed consent which performed according to the  
286 guidelines of the Declaration of Helsinki(Association, 2009).

287 This survey was approved by the Ethics and Human Subject Committee of Sun  
288 Yat-Sen University and any questions were reach a consensus before the consent  
289 forms were signed. Data were obtained from the GSSCH, a sequential cross-sectional  
290 investigation carried out annually in comprised approximately 1,600 primary and  
291 middle schools in Guangzhou city, which done and supported by Sun-Yat Sen  
292 university, Guangzhou school-health promotion center and Guangzhou Education  
293 Bureau. The GSSCH has been conducted for 4 consecutive years, and battery of  
294 relevant measures were done during September and October, the first two months of a  
295 new school year.

296

### 297 **Collecting data and Definition of covariates**

298 The dataset was independently divided by the cross-sectional study conducted in 2020  
299 for identifying the first-ever incidence of HBP among children and adolescents. All  
300 participants were students aged from 5 to 25 years old, and they were examined by

301 trained investigators or practitioners for questionnaires on health-related behaviors,  
302 regular physical examinations, as well as objectively anthropometric data  
303 measurements. 1,102,462 children were removed imputation of missing data,  
304 incomplete data, or the extreme values respecting to the demographic variables or  
305 relevant BP variables based on the 4 Standard deviation(SD) of sex-and age-specific.  
306 148,850 participants were aged above 18. 342,736 subjects were included in our  
307 analysis after the above-mentioned eliminations. The subject group was split into two  
308 parts, training and validation sets, by taking a random sample of 70%(N=239,546) of  
309 the training and the remaining 30%(N=103,190) for validation.

310 Variable information comprised the demographic characteristics (e.g., age, sex,  
311 height, weight, family income), lifestyle-associated factors [e.g., Physical  
312 activity(PA), dietary pattern, sleep pattern] and health-related information(including  
313 medical history, past, current diseases and family history) for hypertension were  
314 assessed in 2020 as the training cohort and validation database, through matching  
315 individuals' identifications. Body mass index(BMI) was calculated as the individuals  
316 body weight in kilograms divided by the square of height in meters, and further  
317 divided into four categories (underweight, normal weight, overweight, obese) adjusted  
318 for age and gender specific. Parental education level was defined as the highest level  
319 of education reported for either the parents, which was divided into, primary school or  
320 below, secondary school, senior high school or junior school, junior college or  
321 university, graduate or above. Parental smoking status separately for the father and  
322 mother was combined with three categories, namely, never smokers (both parents  
323 were never smokers), former, or current smokers (either of the parents were former or  
324 current smokers). The family history of obesity and hypertension was defined by  
325 reported history of obesity and hypertension in immediate family members, while the  
326 gestational hypertension was defined as new-onset hypertension after 20 weeks'  
327 gestation.

328

### 329 **Measurement of High Blood pressure**

330 The child was requested for seating comfortably at least 10 minutes or longer before

331 BP measurement which was conducted in a quiet platform thenceforth. A standard BP  
332 cuff was positioned nearby the right arm elbow, 2 centimeters below the antecubital  
333 fossa, and BP for each child was recorded 3 consecutive times in seated position on  
334 their right arm by a calibrated electronic sphygmomanometer (OMRON, HEM-  
335 4001C, Kyoto, Japan) in single occasion. The diagnosis of HBP was in accordance  
336 with the updating BP diagnostic criteria for Chinese children and adolescents that  
337 average Systolic blood pressure(SBP) or Diastolic blood pressure(DBP) were greater  
338 than or equal to the 95<sup>th</sup> percentile for the corresponding of child's age, sex and  
339 height(Fan, Yan, Jie, & Epidemiology, 2017).

340

#### 341 **Statistical analyses**

342 The continuous variables of participants were presented as mean with standard  
343 deviation and interquartile range (IQR), whereas categorical data were revealed as  
344 absolute frequencies with percentages. For differences between groups of continuous  
345 variables and categorical, the two-sample *t* test or Mann-Whitney test and Chi-Square  
346 test were applied, as appropriate. We first used LASSO-penalized logistic regression to  
347 identify significant predictors by presenting the significance with  $\alpha=0.05$  with over  
348 1000 bootstrap iterations(Tibshirani, 2011). The Odds Ratio(OR) with the following 95%  
349 Confident Interval(CI) were computed as well. Multivariable logistic regression was  
350 generated by putting consecutive candidate variable factors which discard the  
351 predictors according to the *P*-values with the stepwise manner(E. W. S. A et al., 2001).  
352 Along with the nomogram-predicted probability of HBP was constructed. The Bayesian  
353 information criterion and Akaike information criterion(AIC) were used for evaluating  
354 the maximum likelihood model respecting to multivariable logistic regression.  
355 Moreover, we constructed the Area under the receiver-operating characteristic  
356 curve(AUC, or C-index) to assessed the model discrimination while Hosmer-  
357 Lemeshow approach and calibration curve was built for detecting model calibration.  
358 Here, all analyses were conducted using the R language (X64 Version 4.1.0, R  
359 Foundation for Statistical Computing, Vienna, Austria, <https://www.r-project.org/>) with  
360 several packages including “Foreign”, “Hmisc”, “Glmnet”, “Caret”, “Rms” and

361 “pROC”. The bilateral  $P < 0.05$  was recognized as statistically significant.

362

### 363 **Conflict of interest**

364 All other authors declare that they have no conflicts of interest.

365

### 366 **Data availability statement**

367 The survey is not publicly available and participants were protected under a certificate  
368 of confidentiality issued by the Government of Guangzhou due to the sensitivity nature  
369 of data collected from all students group in Guangzhou city. Requests to assess the  
370 dataset from qualified researchers trained in human participant confidentiality protocols  
371 may be sent to the School of public Health, Medical College of Sun Yat-Sen University  
372 at [chenyj68@mail.sysu.edu.cn](mailto:chenyj68@mail.sysu.edu.cn).

373

374

### 375 **References**

- 376 A, E. W. S., B, F. E. H., Jr, A, G. J. J. M. B., A, M. J. C. E., A, Y. V., & A, J. D. F. H. (2001). Internal validation  
377 of predictive models: efficiency of some procedures for logistic regression analysis. *Journal of*  
378 *Clinical Epidemiology*, 54(8), 774-781.
- 379 A, J. M. D., B, K. C. H. M., Geneviève Benoit, M. D. c., D, J. F., E, L. P. B., F, L. C. R., . . . J, A. F. (2017).  
380 Hypertension Canada's 2017 Guidelines for the Diagnosis, Assessment, Prevention, and  
381 Treatment of Pediatric Hypertension. *Canadian Journal of Cardiology*, 33(5), 577-585.
- 382 Antal, M., Reg, ouml, ly, M., eacute, Rei, A., . . . Oacute. (2004). Representative Study for the Evaluation  
383 of Age- and Gender-Specific Anthropometric Parameters and Blood Pressure in an Adolescent  
384 Hungarian Population. *Annals of Nutrition and Metabolism*, 48(5), 307-313.
- 385 Aryanpur, M., Yousefifard, M., Orail, A., Heydari, G., Kazempour-Dizaji, M., Sharifi, H., . . . Jamaati, H.  
386 (2019). Effect of passive exposure to cigarette smoke on blood pressure in children and  
387 adolescents: a meta-analysis of epidemiologic studies. *BMC Pediatrics*, 19.
- 388 Association, W. M. (2009). Declaration of Helsinki. Ethical principles for medical research involving  
389 human subjects. *Journal of the Indian Medical Association*, 14(1), 233-238.
- 390 Ataei, N., Aghamohammadi, A., Yousefi, E., Hosseini, M., Nourijelyani, K., Tayebi, M., . . . Yousefi, M.  
391 (2004). Blood pressure nomograms for school children in Iran. *Pediatric Nephrology*, 19(2),  
392 164-168.
- 393 Barker, & Djp. (2010). The intrauterine origins of cardiovascular disease. *Acta Paediatrica*, 82(s392), 93-  
394 99.
- 395 Bergvall, N., Iliadou, A., Tuvemo, T., & Cnattingius, S. (2005). Birth characteristics and risk of high systolic  
396 blood pressure in early adulthood: socioeconomic factors and familial effects. *Epidemiology*.
- 397 Bloetzer, C., Bovet, P., Suris, J. C., Simeoni, U., Paradis, G., & Chiolerio, A. (2015). Screening for  
398 cardiovascular disease risk factors beginning in childhood. *Public Health Reviews*, 36.
- 399 Brady, T. M. (2017). Obesity-Related Hypertension in Children. *Frontiers In Pediatrics*, 5, 197-.

- 400 Chiolero, A., Cachat, F., Burnier, M., Paccaud, F., & Bovet, P. (2007). Prevalence of hypertension in  
401 schoolchildren based on repeated measurements and association with overweight. *Journal of*  
402 *Hypertension*, 25(11), 2209-2217.
- 403 Cohen, & Meryl, S. (2004). Fetal and childhood onset of adult cardiovascular diseases. *Pediatric Clinics*  
404 *of North America*, 51(6), 1697-1719.
- 405 Collaborators, G. R. F. (2017). Global, regional, and national comparative risk assessment of 84  
406 behavioural, environmental and occupational, and metabolic risks or clusters of risks, 1990–  
407 2016: a systematic analysis for the Global Burden of Disease Study 2016. *Lancet*, 390(10100),  
408 1345-1422.
- 409 Cosenzi, A., S Ac Erdote, A., Bocin, E., Molino, R., & Bellini, G. (1996). Follow up of young people with  
410 high casual blood pressure. *Journal of Human Hypertension*, 10 Suppl 3(9), S71.
- 411 Daly, B., Scragg, R., Schaaf, D., & Metcalf, P. (2005). Low birth weight and cardiovascular risk factors in  
412 Auckland adolescents: a retrospective cohort study. *New Zealand Medical Journal*, 118(1220),  
413 U1612.
- 414 Deng, X., Hou, H., Wang, X., Li, Q., Li, X., Yang, Z., & Wu, H. J. e. (2021). Development and validation of  
415 a nomogram to better predict hypertension based on a 10-year retrospective cohort study in  
416 China. 10. doi:10.7554/eLife.66419
- 417 Dionne, Janis, Harris, Kevin, C., Zarnke, Kelly, B., . . . Doreen, M. (2016). Hypertension Canada's 2016  
418 Canadian Hypertension Education Program Guidelines for Blood Pressure Measurement,  
419 Diagnosis, and Assessment of Risk of Pediatric Hypertension. *The Canadian journal of*  
420 *cardiology*.
- 421 El-Shafie, A. M., El-Gendy, F. M., Allhony, D. M., Fotoh, W., & Galab, W. S. (2018). Establishment of blood  
422 pressure nomograms representative for Egyptian children and adolescents: A cross-sectional  
423 study. *BMJ open*, 8(7), e020609.
- 424 Empar, Lurbe, Enrico, Agabiti, R., Kennedy, Cruickshank, . . . Serap. (2016). 2016 European Society of  
425 Hypertension guidelines for the management of high blood pressure in children and  
426 adolescents. *Journal of Hypertension*.
- 427 Fan, H., Yan, Y. K., Jie, M. I., & Epidemiology, D. O. (2017). Updating blood pressure references for Chinese  
428 children aged 3-17 years. *Chinese Journal of Hypertension*.
- 429 Gansäuer, A., Rosales, A., & Justicia, J. (2005). Relationship between Metabolic Parameters, Blood  
430 Pressure, and Sympathoendocrine Function in Healthy Young Adults with Low Birth Weight.  
431 *Experimental and Clinical Endocrinology and Diabetes*, 113(08), 444-450.
- 432 Giussani, M., Antolini, L., Brambilla, P., Pagani, M., & Genovesi, S. (2013). Cardiovascular risk assessment  
433 in children: role of physical activity, family history and parental smoking on BMI and blood  
434 pressure. *Journal of Hypertension*, 31(5).
- 435 Hamoen, M., Welten, M., Nieboer, D., Heymans, M. W., & Wang, L. (2020). Development of a prediction  
436 model to target screening for high blood pressure in children. *Preventive Medicine*, 132,  
437 105997-.
- 438 Hansen, Matthew, L, Gunn, Paul, W, . . . C. (2007). Underdiagnosis of Hypertension in Children and  
439 Adolescents. *JAMA*.
- 440 Kaelber, D. C., Liu, W., Ross, M., Localio, A. R., Leon, J. B., Pace, W. D., . . . Fiks, A. G. (2016). Diagnosis  
441 and Medication Treatment of Pediatric Hypertension: A Retrospective Cohort Study. *Pediatrics*,  
442 138(6), e20162195-e20162195.
- 443 Katona, é., Zrínyi, M., Komonyi, é., Lengyel, S., Paragh, G. R., Zatik, J., . . . Páll, D. (2011). Factors

- 444 influencing adolescent blood pressure: the Debrecen Hypertension Study. *Kidney and Blood*  
445 *Pressure Research*, 34(3), 188-195.
- 446 Kawabe, H., Shibata, H., Hirose, H., Tsujioka, M., Saito, I., & Saruta, T. (2000). Determinants for the  
447 development of hypertension in adolescents. A 6-year follow-up. *Journal of Hypertension*,  
448 18(11), 1557-1561.
- 449 Kelishadi, R., Ardalan, G., Gheiratmand, R., Majdzadeh, R., Delavari, A., Heshmat, R., . . . Mokhtari, M.  
450 R. (2006). Blood pressure and its influencing factors in a national representative sample of  
451 Iranian children and adolescents: the CASPIAN Study. *European journal of cardiovascular*  
452 *prevention and rehabilitation : official journal of the European Society of Cardiology, Working*  
453 *Groups on Epidemiology & Prevention and Cardiac Rehabilitation and Exercise Physiology*, 13(6),  
454 956.
- 455 Kollias, A., Antonodimitrakis, P., Grammatikos, E., Chatziantonakis, N., Grammatikos, E. E., & Stergiou,  
456 G. S. (2009). Trends in high blood pressure prevalence in Greek adolescents. *Journal of Human*  
457 *Hypertension*, 23(6), 385-390.
- 458 Lagos, Carlos, F., Fardella, Carlos, E., Vecchiola, Andrea, . . . Rene. (2016). Aldosterone Production and  
459 Signaling Dysregulation in Obesity. *Current hypertension reports*.
- 460 Lauer, R. M., Anderson, A. R., Beaglehole, R., & Burns, T. L. (1984). Factors related to tracking of blood  
461 pressure in children. U.S. National Center for Health Statistics Health Examination Surveys  
462 Cycles II and III. *Hypertension*, 6(3), 307.
- 463 Li, C., Sun, D., Liu, J., Li, M., & Zhou, J. (2019). A Prediction Model of Essential Hypertension Based on  
464 Genetic and Environmental Risk Factors in Northern Han Chinese. *International Journal of*  
465 *Medical Sciences*, 16(6), 793-799.
- 466 Lim, S. S., Vos, T., Flaxman, A. D., Danaei, G., Shibuya, K., Adair-Rohani, H., . . . Aryee, M. (2012). A  
467 comparative risk assessment of burden of disease and injury attributable to 67 risk factors and  
468 risk factor clusters in 21 regions, 1990-2010: a systematic analysis for the Global Burden of  
469 Disease Study 2010. *LANCET -LONDON-*, 380(9859), 2224-2260.
- 470 Martin, & R, M. (2005). Breastfeeding in Infancy and Blood Pressure in Later Life: Systematic Review and  
471 Meta-Analysis. *American Journal of Epidemiology*, 161(1), 15-26.
- 472 McNiece, K. L., Poffenbarger, T. S., Turner, J. L., Franco, K. D., Sorof, J. M., & Portman, R. J. (2007).  
473 Prevalence of hypertension and pre-hypertension among adolescents. *Journal of Pediatrics*,  
474 150(6), 640-644.e641.
- 475 Moyer, & Virginia, A. (2013). Screening for Primary Hypertension in Children and Adolescents: U.S.  
476 Preventive Services Task Force Recommendation Statement\*. *Annals of Internal Medicine*,  
477 159(9), 613-619.
- 478 None. (2017). Flynn JT, Kaelber DC, Baker-Smith CM, et al; SUBCOMMITTEE ON SCREENING AND  
479 MANAGEMENT OF HIGH BLOOD PRESSURE IN CHILDREN. Clinical Practice Guideline for  
480 Screening and Management of High Blood Pressure in Children and Adolescents. *Pediatrics*.  
481 2017; 140(3). *Pediatrics*, 140(6), e20173035.
- 482 Ouchi, N., Parker, J. L., Lugus, J. J., & Walsh, K. Adipokines in inflammation and metabolic disease. *Nature*  
483 *Reviews Immunology*.
- 484 Owen, Christopher, G., Whincup, Peter, H., Gilg, Julie, A., . . . Derek, G. (2003). Effect of breast feeding  
485 in infancy on blood pressure in later life: systematic review and meta-analysis. (cover story).  
486 *BMJ: British Medical Journal (International Edition)*.
- 487 Rosner, B., Cook, N. R., Daniels, S., & Falkner, B. (2013). Childhood blood pressure trends and risk factors

- 488 for high blood pressure: the NHANES experience 1988-2008. *Hypertension*, 62(2), 247-254.  
489 doi:10.1161/HYPERTENSIONAHA.111.00831
- 490 Roya, Kelishadi, Atefeh, Noori, Mostafa, Qorbani, . . . Djalalinia. (2016). Are active and passive smoking  
491 associated with cardiometabolic risk factors in adolescents? The CASPIAN-III Study. *Paediatrics  
492 and International Child Health*.
- 493 Royston, P., Altman, D. G., & Sauerbrei, W. (2005). Dichotomizing continuous predictors in multiple  
494 regression: a bad idea.
- 495 Simonetti, G. D., Schwertz, R., Klett, M., Hoffmann, G. F., Schaefer, F., & Wuhl, E. (2011). Determinants  
496 of blood pressure in preschool children: the role of parental smoking. *Circulation*, 123(3), 292-  
497 298.
- 498 Song, P., Zhang, Y., Yu, J., Zha, M., & Rudan, I. (2019). Global Prevalence of Hypertension in Children: A  
499 Systematic Review and Meta-analysis. *JAMA pediatrics*, 173(12), 1.
- 500 Steyerberg, E. W., & Vergouwe, Y. (2014). Towards better clinical prediction models: Seven steps for  
501 development and an ABCD for validation. *European Heart Journal*, 35(29).
- 502 Strong, W. B., Malina, R. M., Blimkie, C., Daniels, S. R., Dishman, R. K., Gutin, B., . . . Pivarnik, J. M. (2005).  
503 Evidence based physical activity for school-age youth. *The Journal of pediatrics*, 146.
- 504 Tibshirani, R. (2011). Regression shrinkage and selection via the lasso: a retrospective. *Journal of the  
505 Royal Statistical Society: Series B (Statistical Methodology)*, 73(3), 267-288.
- 506 Von, E. E., Altman, D. G., & Egger, M. (2007). The strengthening the reporting of observational studies  
507 in epidemiology(STROBE) statement: Guidelines for reporting observational studies [J].  
508 *Preventive Medicine*, 45(10).
- 509



**Table.1 Comparison of baseline characteristics between HBP group and non-HBP group**

| <b>Characteristics</b>                 | <b>Total<br/>(n= 342,736)</b> | <b>HBP<br/>group(n=55,480)</b> | <b>Non-HBP<br/>group(n=287,256)</b> | <b>P-value</b> |
|----------------------------------------|-------------------------------|--------------------------------|-------------------------------------|----------------|
| <b>Age(year)(mean±SD)</b>              | 11.51 ± 2.73                  | 12.22 ± 2.88                   | 11.37 ± 2.68                        | < 0.001        |
| <b>Boys [n(%)]</b>                     | 183,487(53.5)                 | 35,246(63.5)                   | 148,241(51.6)                       | < 0.001        |
| <b>Feeding mode [n(%)]</b>             |                               |                                |                                     |                |
| Breastfeeding                          | 136,442(39.8)                 | 21,455(38.7)                   | 114,987(40.0)                       | < 0.001        |
| Bottle feeding                         | 140,342(40.9)                 | 18,325(33.0)                   | 122,017(42.5)                       |                |
| Partial breastfeeding                  | 65,952(19.2)                  | 15,700(28.3)                   | 50,252(17.5)                        |                |
| <b>Birthweight (g)(mean±SD)</b>        |                               |                                |                                     |                |
| 2500-4000                              | 307,250(89.6)                 | 40,922(73.8)                   | 266,328(92.7)                       | < 0.001        |
| < 2500                                 | 34,046(9.9)                   | 14,117(25.4)                   | 19,929(6.9)                         |                |
| > 4000                                 | 1,440(0.4)                    | 441(0.8)                       | 999(0.3)                            |                |
| <b>Gestational hypertension [n(%)]</b> | 6,133(1.8)                    | 1,355(2.4)                     | 4,778(1.7)                          | < 0.001        |
| <b>SBP(mmHG)</b>                       | 104.05 ± 10.17                | 116.10 ± 8.25                  | 101.73 ± 8.76                       | < 0.001        |
| <b>DBP(mmHG)</b>                       | 64.95 ± 6.88                  | 71.17 ± 6.48                   | 63.75 ± 6.29                        | < 0.001        |
| <b>BMI(kg/m2)(mean±SD)</b>             | 18.00 ± 3.36                  | 19.25 ± 3.88                   | 17.75 ± 3.19                        | < 0.001        |
| <b>Weight status [n(%)]</b>            |                               |                                |                                     |                |
| Underweight                            | 39,382(11.5)                  | 8,682(15.6)                    | 30,700(10.7)                        | < 0.001        |
| Normal weight                          | 241,1212(704.4)               | 36,145(65.1)                   | 205,067(71.4)                       |                |
| Overweight                             | 26,443(7.7)                   | 6,749(12.2)                    | 19,694(6.9)                         |                |
| Obese                                  | 35,699(10.4)                  | 3,904(7.0)                     | 31,795(11.1)                        |                |
| <b>Parental smoking status [n(%)]</b>  |                               |                                |                                     |                |
| Never smokers                          | 156,156(45.6)                 | 25,208(45.4)                   | 130,948(45.6)                       | < 0.001        |
| Former smokers                         | 14,839(12.2)                  | 6,987(12.6)                    | 34,852(12.1)                        |                |
| Current smokers                        | 144,741(42.2)                 | 23,285(42.0)                   | 121,456(42.3)                       |                |
| <b>Parental education level [n(%)]</b> |                               |                                |                                     | 0.552          |

|                                                      |               |               |               |         |
|------------------------------------------------------|---------------|---------------|---------------|---------|
| Primary school or below                              | 5,194(1.5)    | 866(1.6)      | 4,328(1.5)    |         |
| Secondary school                                     | 87,255(25.5)  | 14,085(25.4)  | 73,170(25.5)  |         |
| Senior high school or junior school                  | 93,230(27.2)  | 15,023(27.1)  | 78,207(27.2)  |         |
| Junior college or university                         | 142,442(41.6) | 23,084(41.6)  | 119,358(41.6) |         |
| Graduate or above                                    | 14,615(4.3)   | 2,422(4.4)    | 12,193(4.2)   |         |
| <b>Family history of hypertension [n(%)]</b>         | 126,981(37.0) | 12,593(22.7)  | 114,388(39.8) | < 0.001 |
| <b>Family history of obesity [n(%)]</b>              | 48,135(14.0)  | 8,295(15.0)   | 39,840(13.9)  | < 0.001 |
| <b>Household monthly income [n(%)]</b>               |               |               |               |         |
| <5000,RMB                                            | 156,994(45.8) | 24,547(44.2)  | 132,447(46.1) |         |
| 5000~7999, RMB                                       | 78,761(23.0)  | 13,161(23.7)  | 65,600(22.8)  | < 0.001 |
| 8000~11999, RMB                                      | 69,654(20.3)  | 11,657(21.0)  | 57,997(20.2)  |         |
| ≥12000, RMB                                          | 37,327(10.9)  | 6,115(11.0)   | 31,212(10.9)  |         |
| <b>PA time(Mins/day)(mean±SD)</b>                    | 62.03 ± 53.64 | 62.63 ± 54.22 | 61.92 ± 53.53 | 0.004   |
| <b>Average outdoor physical activity time [n(%)]</b> |               |               |               |         |
| <1 h/day                                             | 157,116(45.8) | 29,274(52.8)  | 127,842(44.5) |         |
| 1-1.9 h/day                                          | 151,117(44.1) | 20,813(37.5)  | 130,304(45.4) | < 0.001 |
| 2-4 h/day                                            | 29,311(8.6)   | 4,534(8.2)    | 24,777(8.6)   |         |
| >4 h/day                                             | 5,192(1.5)    | 859(1.5)      | 4,333(1.5)    |         |
| <b>SBT time(Mins/day)(mean±SD)</b>                   | 41.97 ± 47.85 | 44.10 ± 51.37 | 41.56 ± 47.13 | < 0.001 |
| <b>Average Screen-based time [n(%)]</b>              |               |               |               |         |
| <2 h/day                                             | 324,517(94.7) | 52,030(93.8)  | 272,487(94.9) | < 0.001 |
| 2-4 h/day                                            | 14,861(4.3)   | 2,761(5.0)    | 12,100(4.2)   |         |
| >4 h/day                                             | 3,358(1.0)    | 689(1.2)      | 2,669(0.9)    |         |
| <b>Fried food intake (serving/week)</b>              | 0.89 ± 1.18   | 0.91 ± 1.23   | 0.88 ± 1.17   | < 0.001 |

Data were presented as mean (SD), median (IQR) or n (%).

HBP, High blood pressure; PA, Physical activity; SBT, Screen-based time; SDP, Systolic blood pressure; DBP, Diastolic blood pressure.

**Table.2 Multivariable Logistic regression analysis of variables predicting HBP in the development Group**

| <b>Variables</b>                      | <b>OR</b>              | <b>P-value</b> |
|---------------------------------------|------------------------|----------------|
| <b>Age</b>                            | 1.142 (1.137 to 1.147) | <0.001         |
| <b>Gender</b>                         |                        |                |
| Boy                                   | Ref                    |                |
| Girl                                  | 0.593 (0.578 to 0.607) | <0.001         |
| <b>Feeding mode</b>                   |                        |                |
| Breastfeeding                         | Ref                    |                |
| Bottle feeding                        | 1.656 (1.608 to 1.706) | <0.001         |
| Partial breastfeeding                 | 0.833 (0.811 to 0.856) | <0.001         |
| <b>Birthweight</b>                    |                        |                |
| 2500-4000                             | Ref                    |                |
| < 2500                                | 4.906 (4.757 to 5.060) | <0.001         |
| > 4000                                | 2.494 (2.157 to 2.876) | <0.001         |
| <b>Gestational hypertension</b>       |                        |                |
| Gestational hypertension              | Ref                    |                |
| Non-Gestational hypertension          | 0.720 (0.665 to 0.779) | <0.001         |
| <b>Weight status</b>                  |                        |                |
| Underweight                           | Ref                    |                |
| Normal weight                         | 0.715 (0.684 to 0.747) | <0.001         |
| Overweight                            | 1.825 (1.765 to 1.888) | <0.001         |
| Obese                                 | 2.430 (2.337 to 2.526) | <0.001         |
| <b>Parental smoking status</b>        |                        |                |
| Never smokers                         | Ref                    |                |
| Former smokers                        | 1.020 (0.982 to 1.059) | 0.301          |
| Current smokers                       | 1.012 (0.987 to 1.038) | 0.362          |
| <b>Parental education level</b>       |                        |                |
| Primary school or below               | Ref                    |                |
| Secondary school                      | 1.132 (1.029 to 1.247) | 0.012          |
| Senior high school or junior school   | 1.188 (1.080 to 1.310) | <0.001         |
| Junior college or university          | 1.352 (1.229 to 1.490) | <0.001         |
| Graduate or above                     | 1.521 (1.361 to 1.701) | <0.001         |
| <b>Family history of hypertension</b> |                        |                |
| Non-Family history of hypertension    | Ref                    |                |
| Family history of hypertension        | 2.618 (2.545 to 2.693) | <0.001         |
| <b>Family history of obesity</b>      |                        |                |
| Family history of obesity             | Ref                    |                |
| Non-Family history of obesity         | 0.706 (0.682 to 0.731) | <0.001         |
| <b>Household monthly income</b>       |                        |                |
| <5000,RMB                             | Ref                    |                |

|                                               |     |                        |        |
|-----------------------------------------------|-----|------------------------|--------|
| 5000~7999, RMB                                |     | 1.058 (1.026 to 1.090) | <0.001 |
| 8000~11999, RMB                               |     | 1.045 (1.011 to 1.079) | <0.001 |
| ≥12000, RMB                                   |     | 1.055 (1.012 to 1.100) | 0.011  |
| <b>Average outdoor physical activity time</b> |     |                        |        |
| <1 h/day                                      | Ref |                        |        |
| 1-1.9 h/day                                   |     | 0.672 (0.655 to 0.689) | <0.001 |
| 2-4 h/day                                     |     | 0.724 (0.693 to 0.756) | <0.001 |
| >4 h/day                                      |     | 0.755 (0.687 to 0.829) | <0.001 |
| <b>Average Screen-based time</b>              |     |                        |        |
| <2 h/day                                      | Ref |                        |        |
| 2-4 h/day                                     |     | 1.053 (0.996 to 1.113) | 0.066  |
| >4 h/day                                      |     | 1.191 (1.069 to 1.325) | <0.001 |
| <b>Fried food intake (serving/week)</b>       |     | 1.035 (1.026 to 1.045) | <0.001 |

---

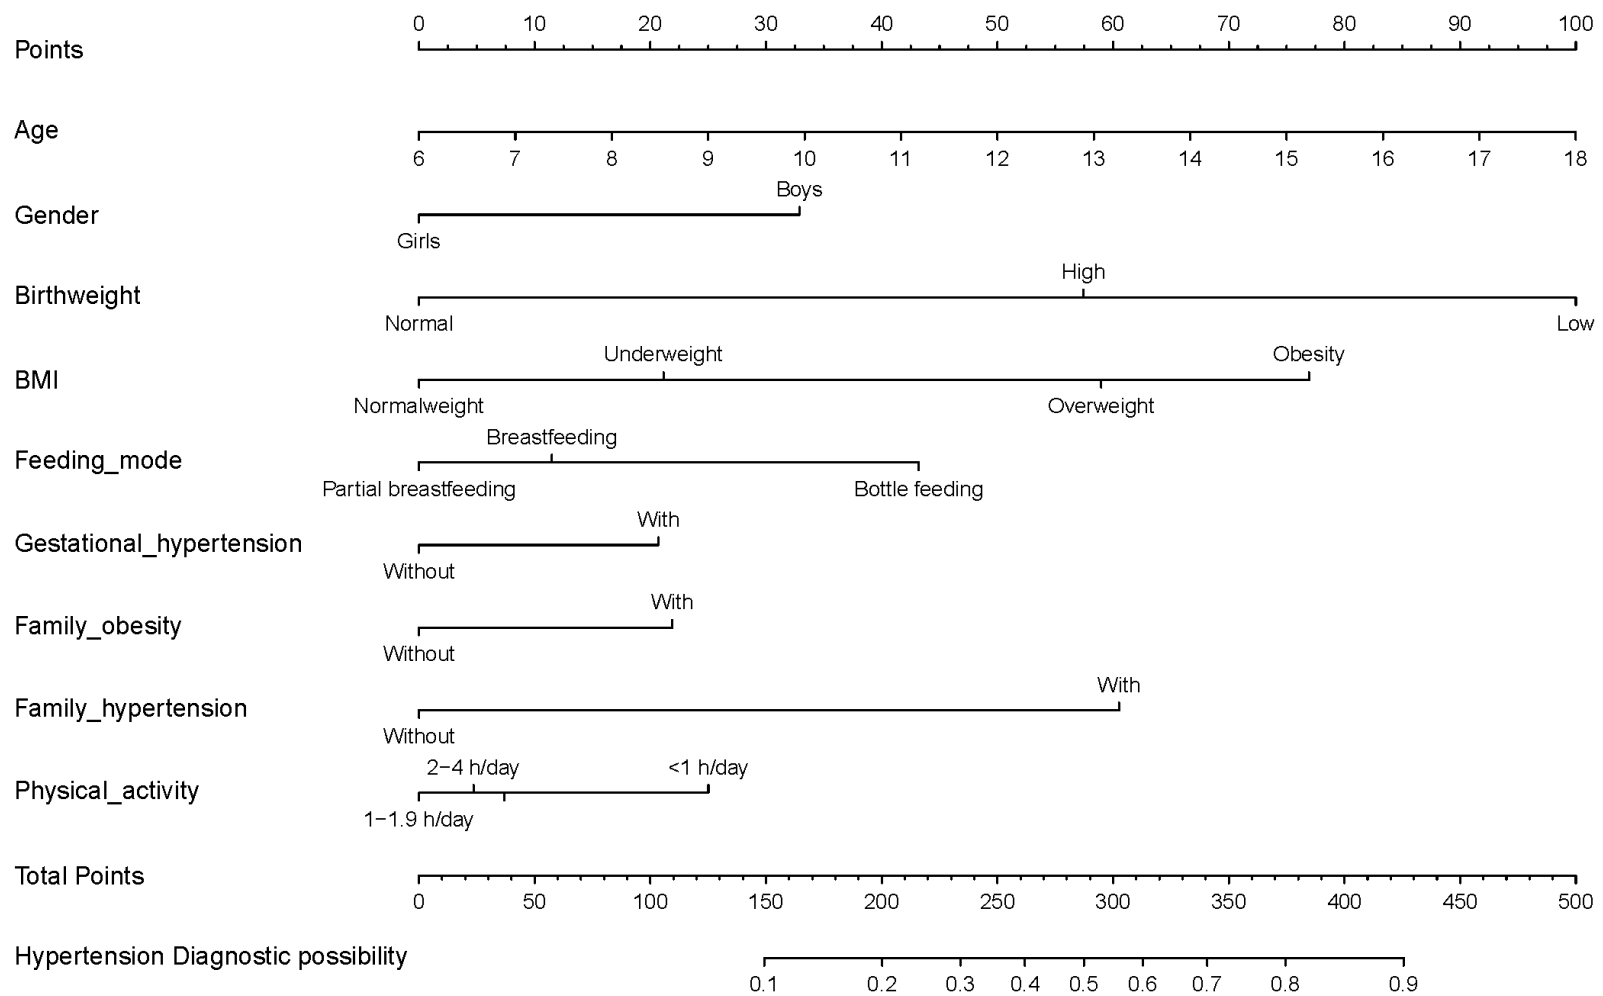

**Figure.1 Clinical nomogram for predicting probability of developing HBP among children and adolescents, and its predictive performance.**

To use the nomogram, an individual HBP contact's values is located on each variable axis, and a line is drawn downward to the risk of HBP axes to detect the hypertension probability. As an example of how this nomogram can be calculated, we can take an 18 years old obese boy who was received a bottle feeding in early life, with gestational hypertension, family of hypertension and obesity, and less than one-hour physical activity expenditure. By drawing a line up towards the points for each of the variables this student will have 100 points(Age), 32 points(Gender), 74 points(BMI status), 42 points(Feeding mode), 20 points(Gestational hypertension), 21 points(Family obesity), 59 points(Family hypertension) and 26 points(Physical activity), giving a total of 374 points(at the bottom of the figure), and a probability of HBP of 80%.

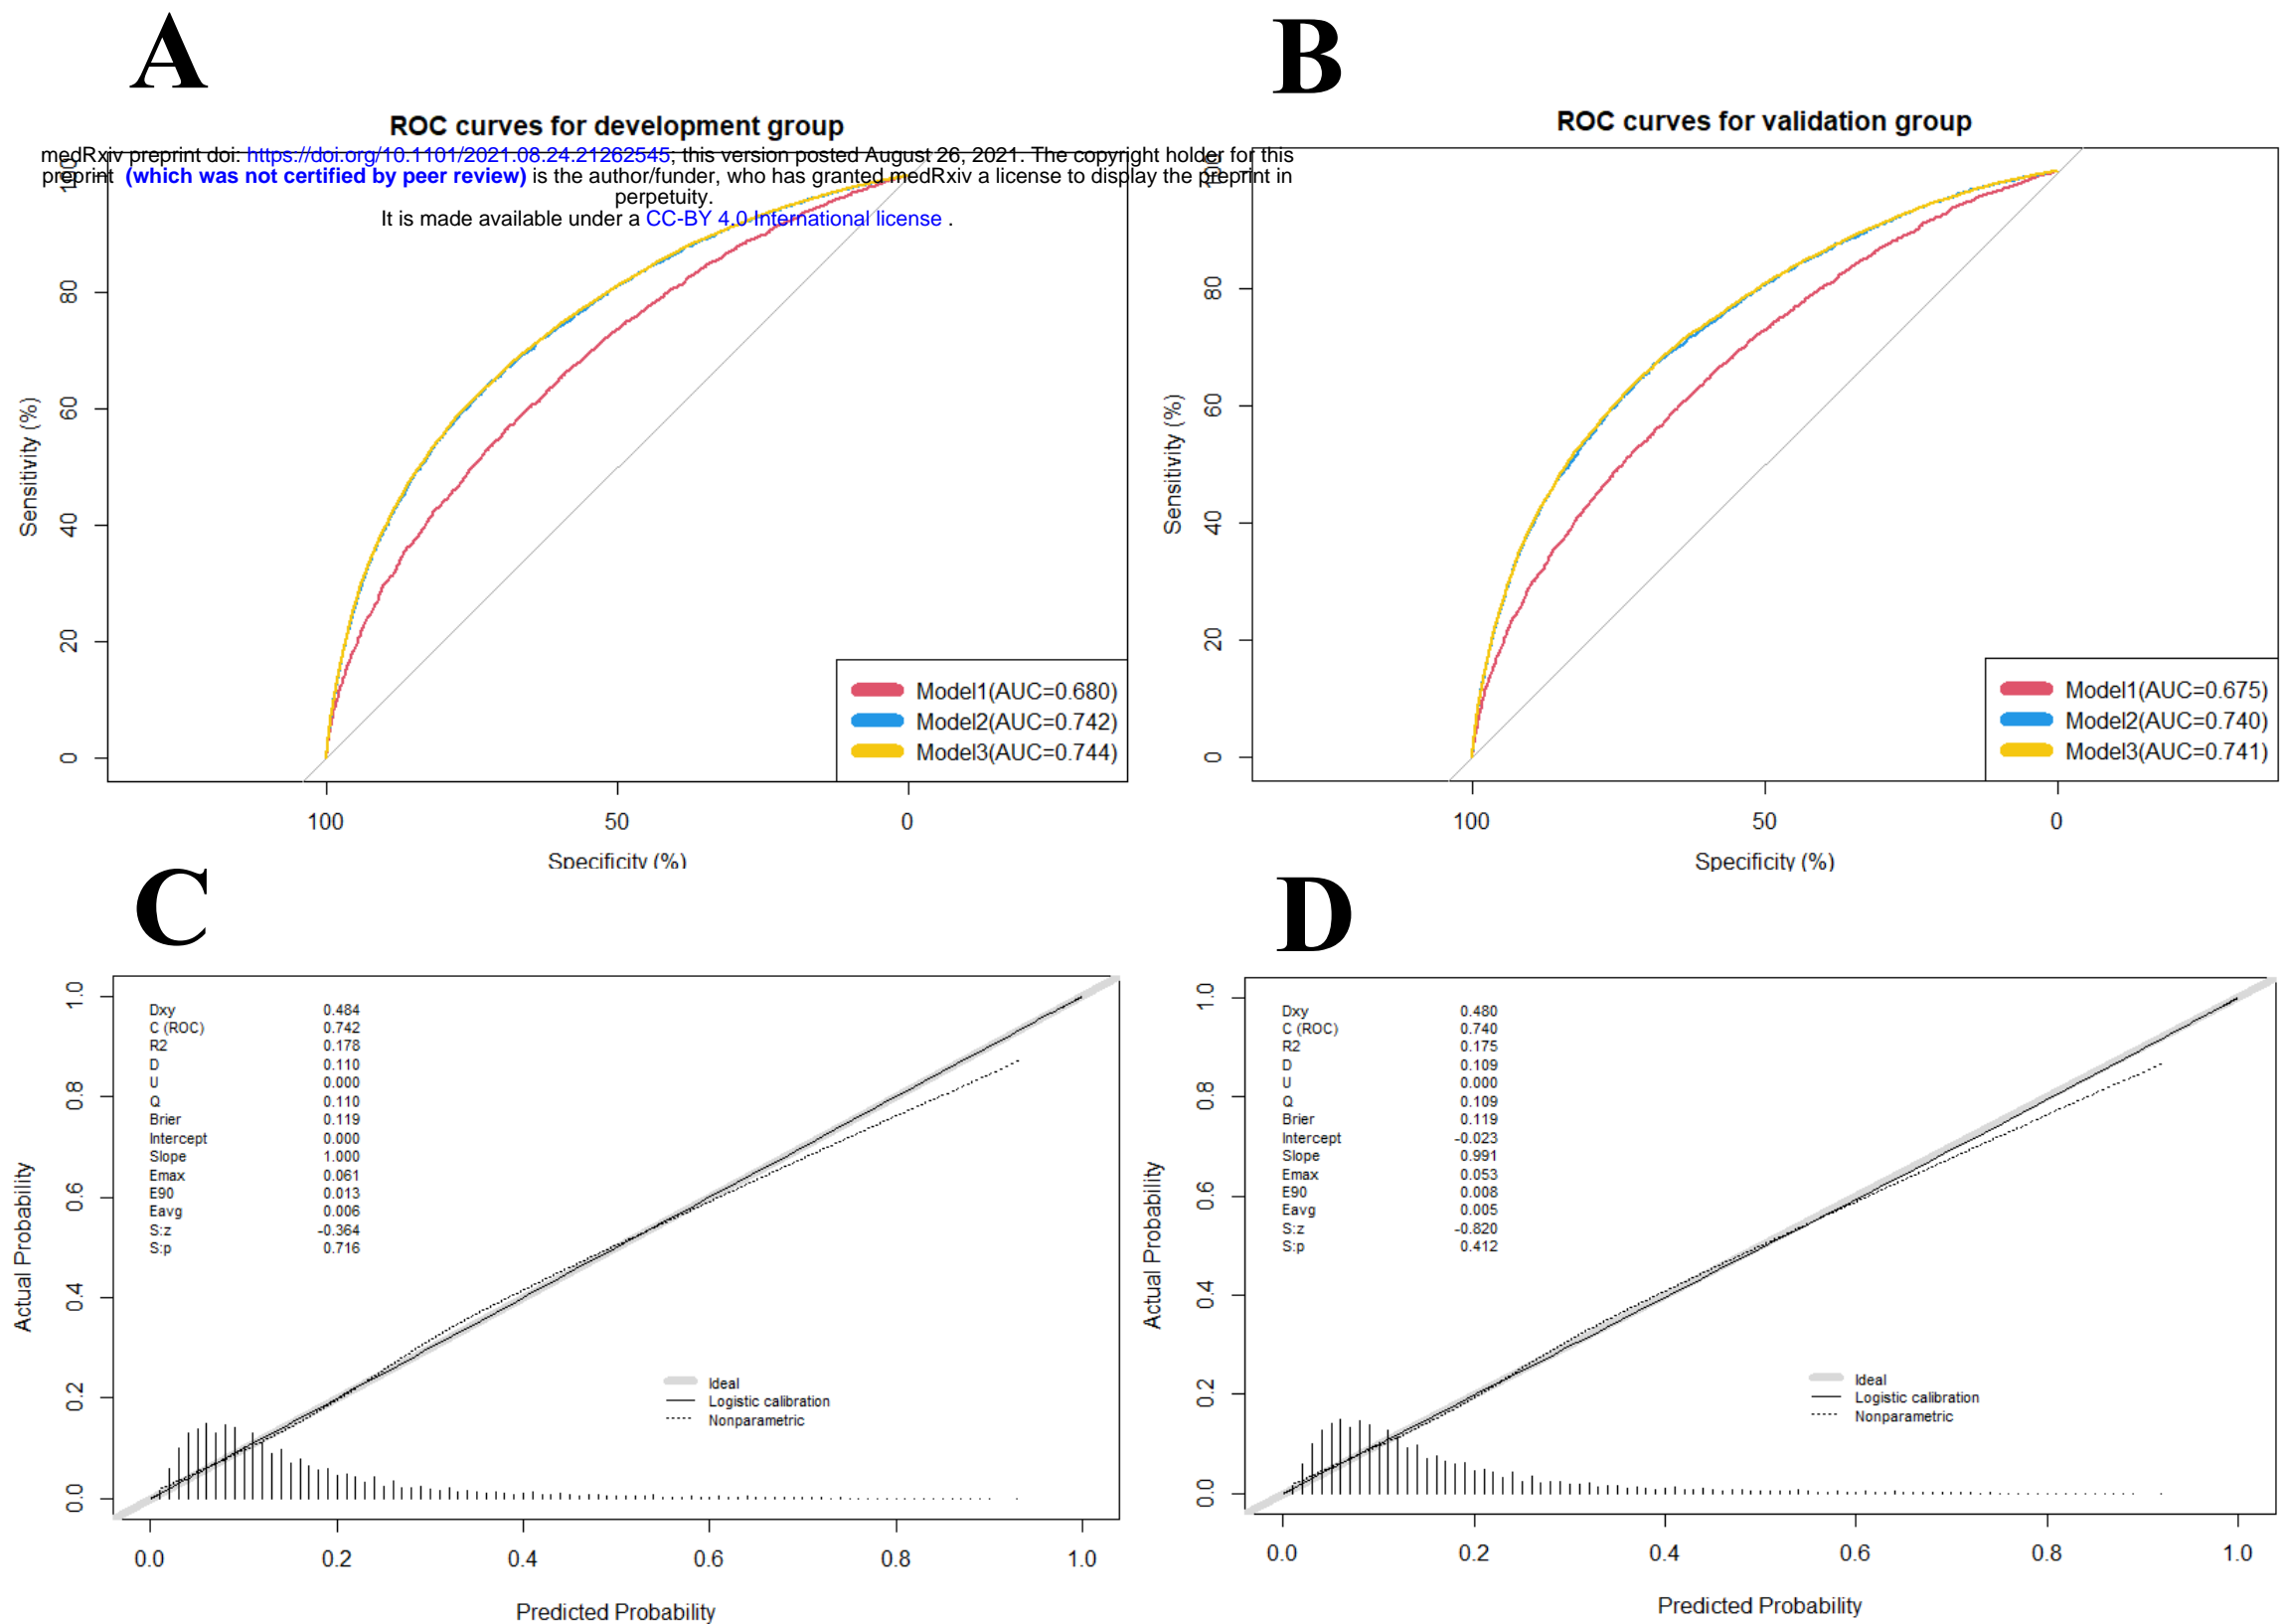

**Figure.2 Receiver operating characteristic (ROC) curves for the prediction of high blood pressure in the training group and validation group.**

(A) ROC curves of the factors and nomogram in the development group; (B) ROC curves of the factors and nomogram in the training group; (C) Calibration plot of nomogram prediction in the development group; (D) Calibration plot of nomogram prediction in the validation group. ROC curves from the prediction model and other predictive strategies (Model1: Age, gender, gestational hypertension, weight status, family history of hypertension, family history of obesity, average outdoor physical activity time; Model2: Age, gender, gestational hypertension, weight status, family history of hypertension, family history of obesity, average outdoor physical activity time, birthweight, feeding mode; Model3: Age, gender, gestational hypertension, weight status, family history of hypertension, family history of obesity, average outdoor physical activity time, birthweight, feeding mode; parental smoking status, parental education level, household monthly income, average screen-based time, fried food intake.) for comparison. Calibration curve represents the calibration of the nomogram, which shows the consistency between the predicted probability of conversion and actual conversion probability of HBP patients. The x-axis is the predicted probability by nomogram and the y-axis is the actual conversion rate of HBP patients. The grey line represents a perfect prediction by an ideal model, and the black-dotted line shows the performance of the nomogram, of which a closer fit to the grey line means a better prediction.

**A**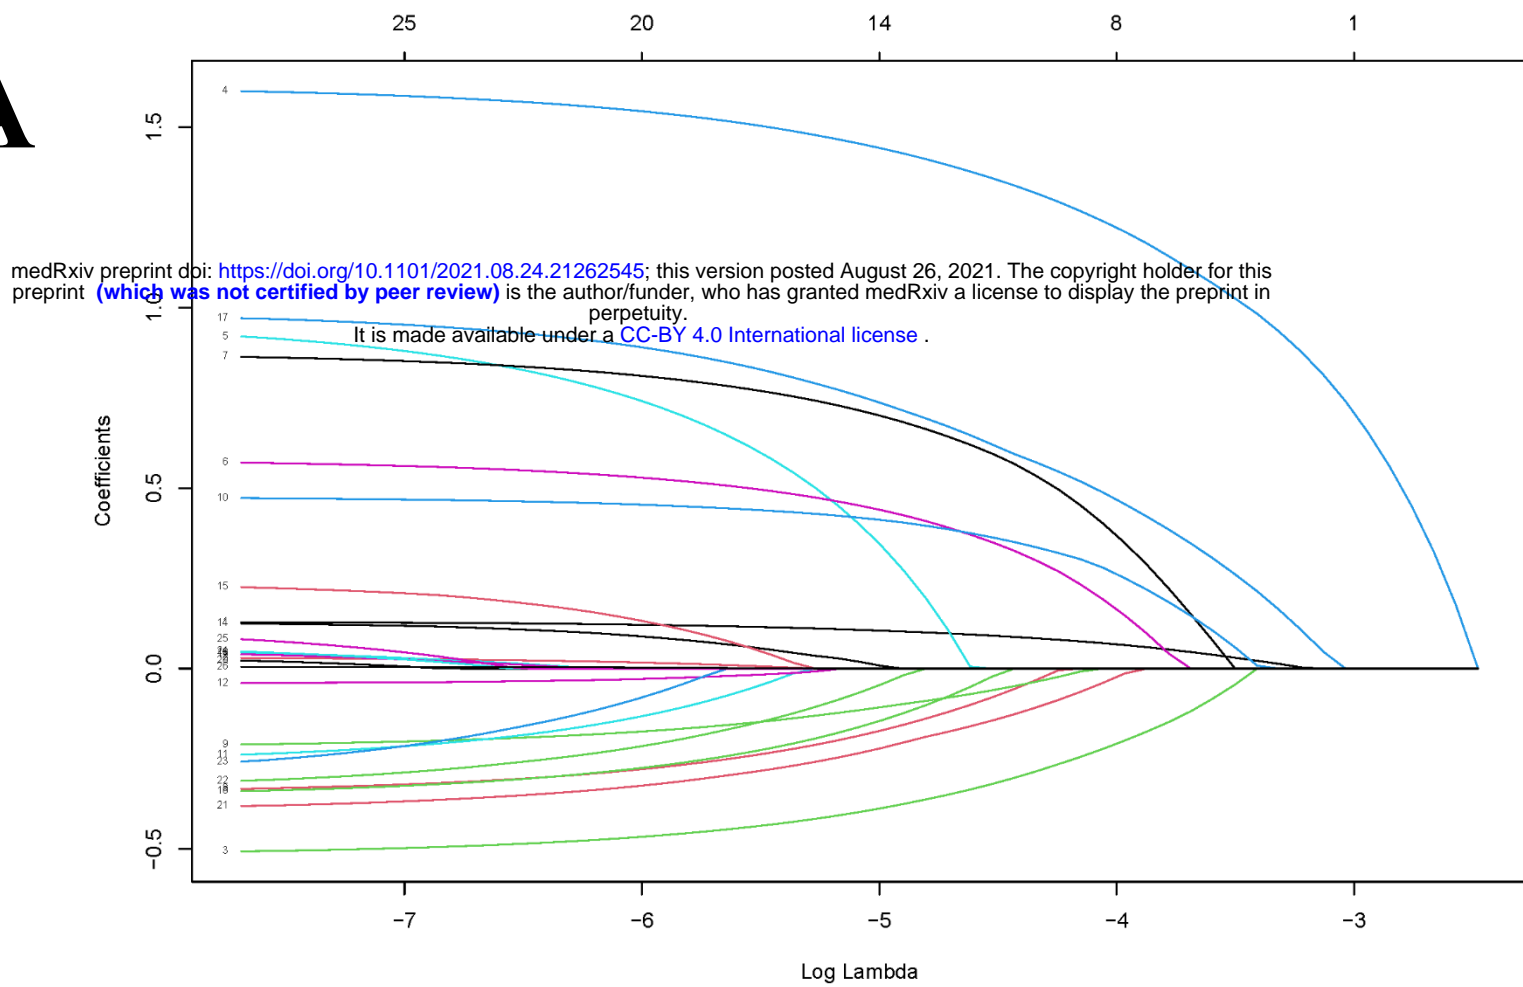**B**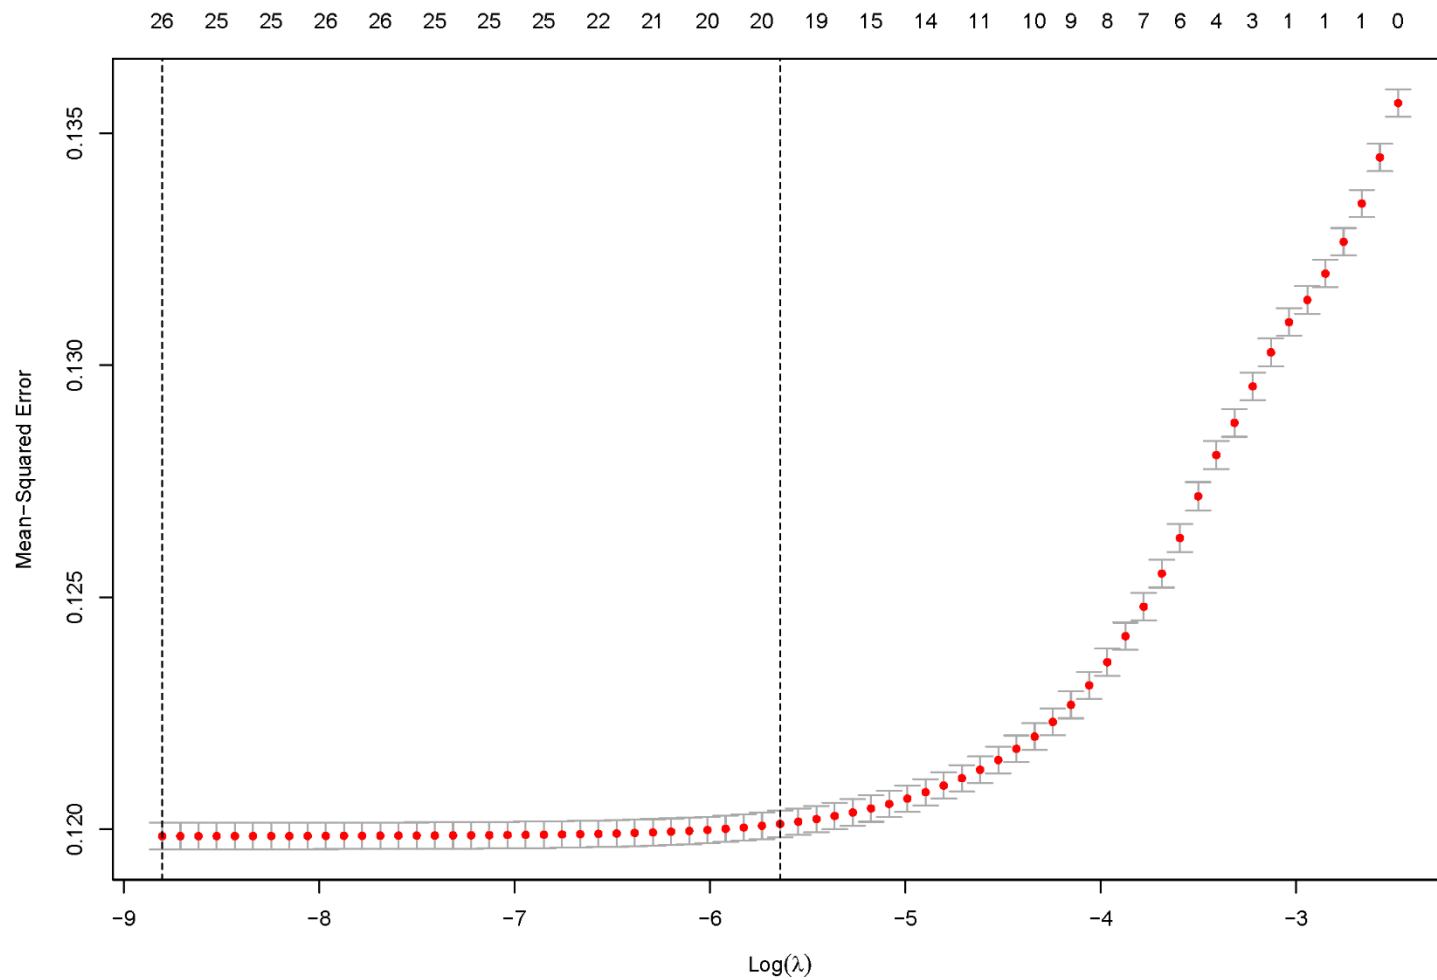

**Figure.3 Predictor selection using the LASSO binary logistic regression model.** A LASSO coefficient of the total 14 predictors. (A) LASSO coefficient profiles of all predictors, a coefficient profile plot was provided against the log (Lambda) sequence. (B) Predictors selection by LASSO via minimum criteria, predictor selection in the LASSO model used tenfold cross-validation via minimum criteria. Red-dotted vertical lines were drawn at the optimal values by using the minimum criteria (minimize the mean-squared error), the value 9 represents those 14 predictors were reduced to 9 nonzero features by LASSO.

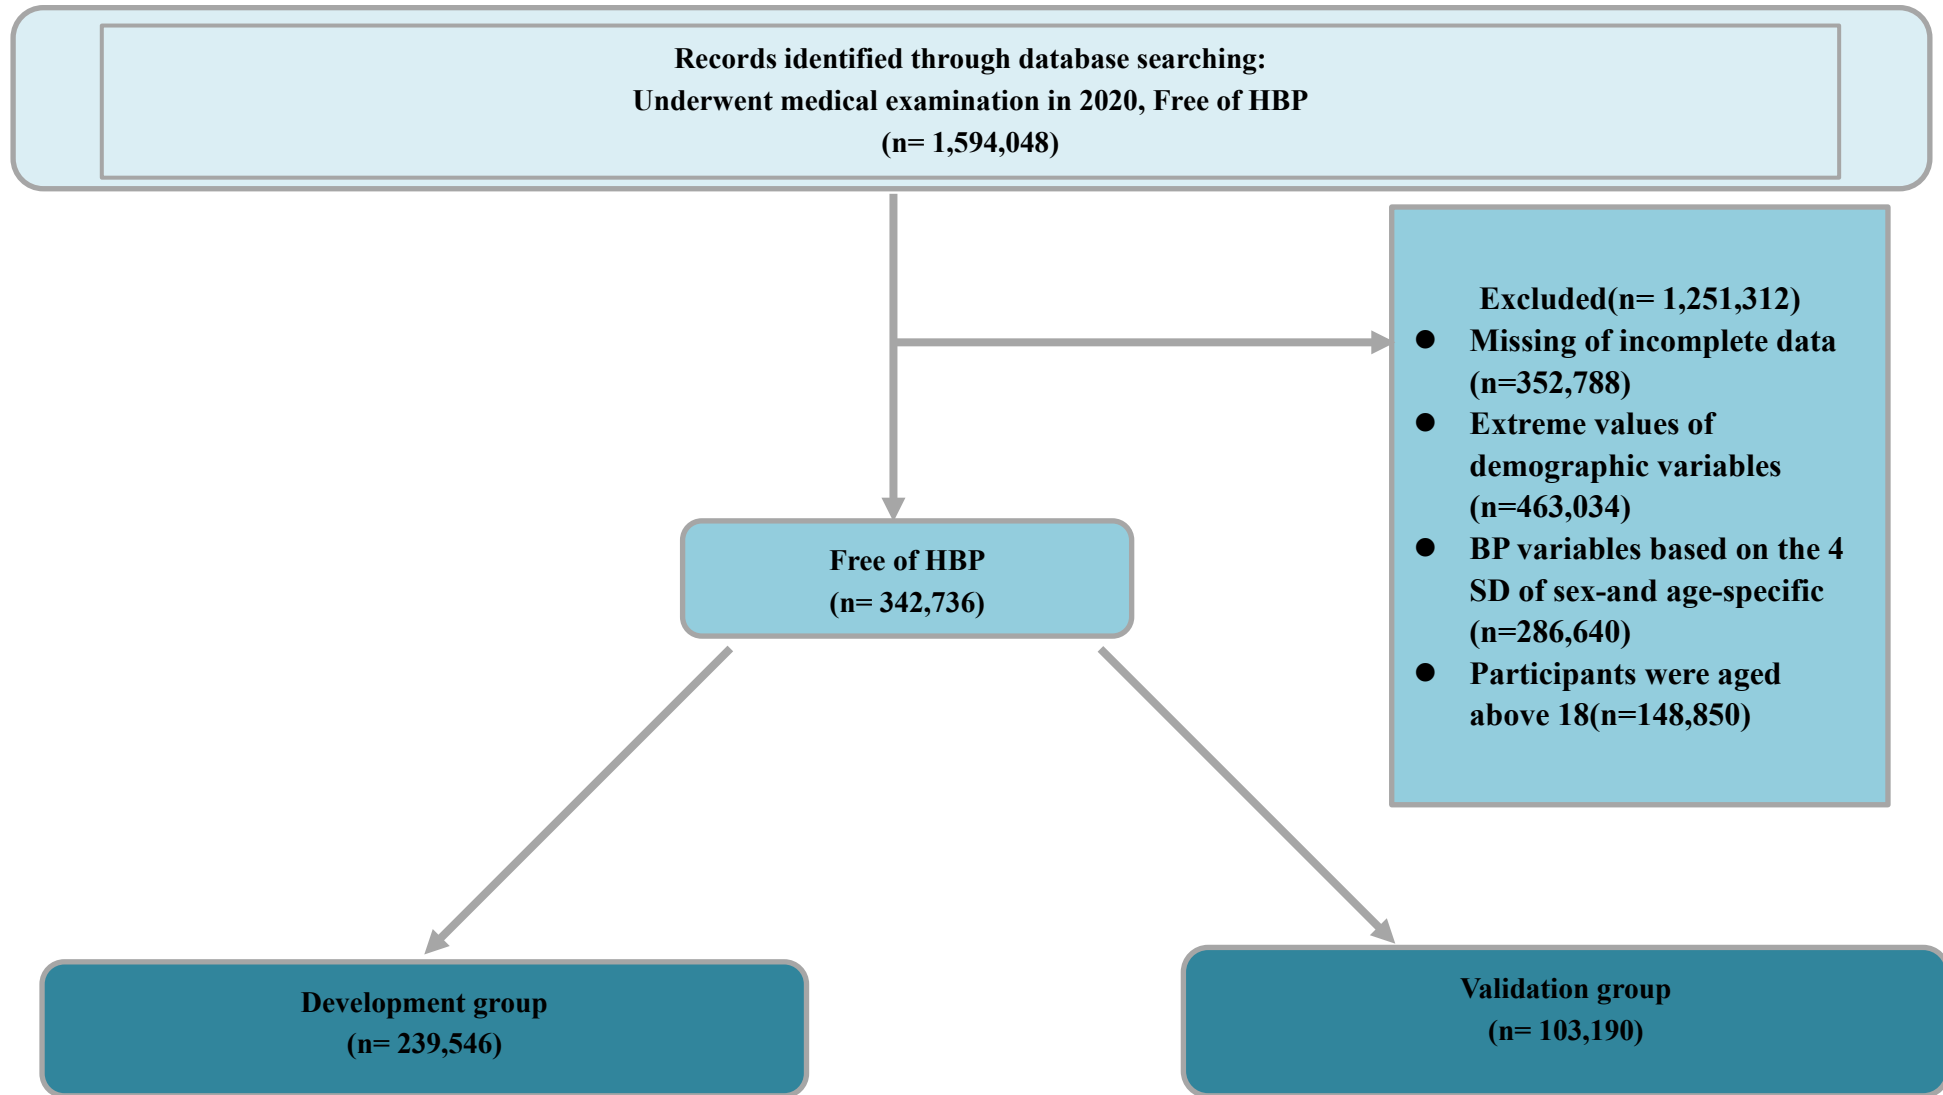

**Supplementary Figure.1** Flow chart illustrating the inclusion and exclusion of participants into the study. BP, Blood pressure; HBP, High blood pressure; SD, Standard deviation.



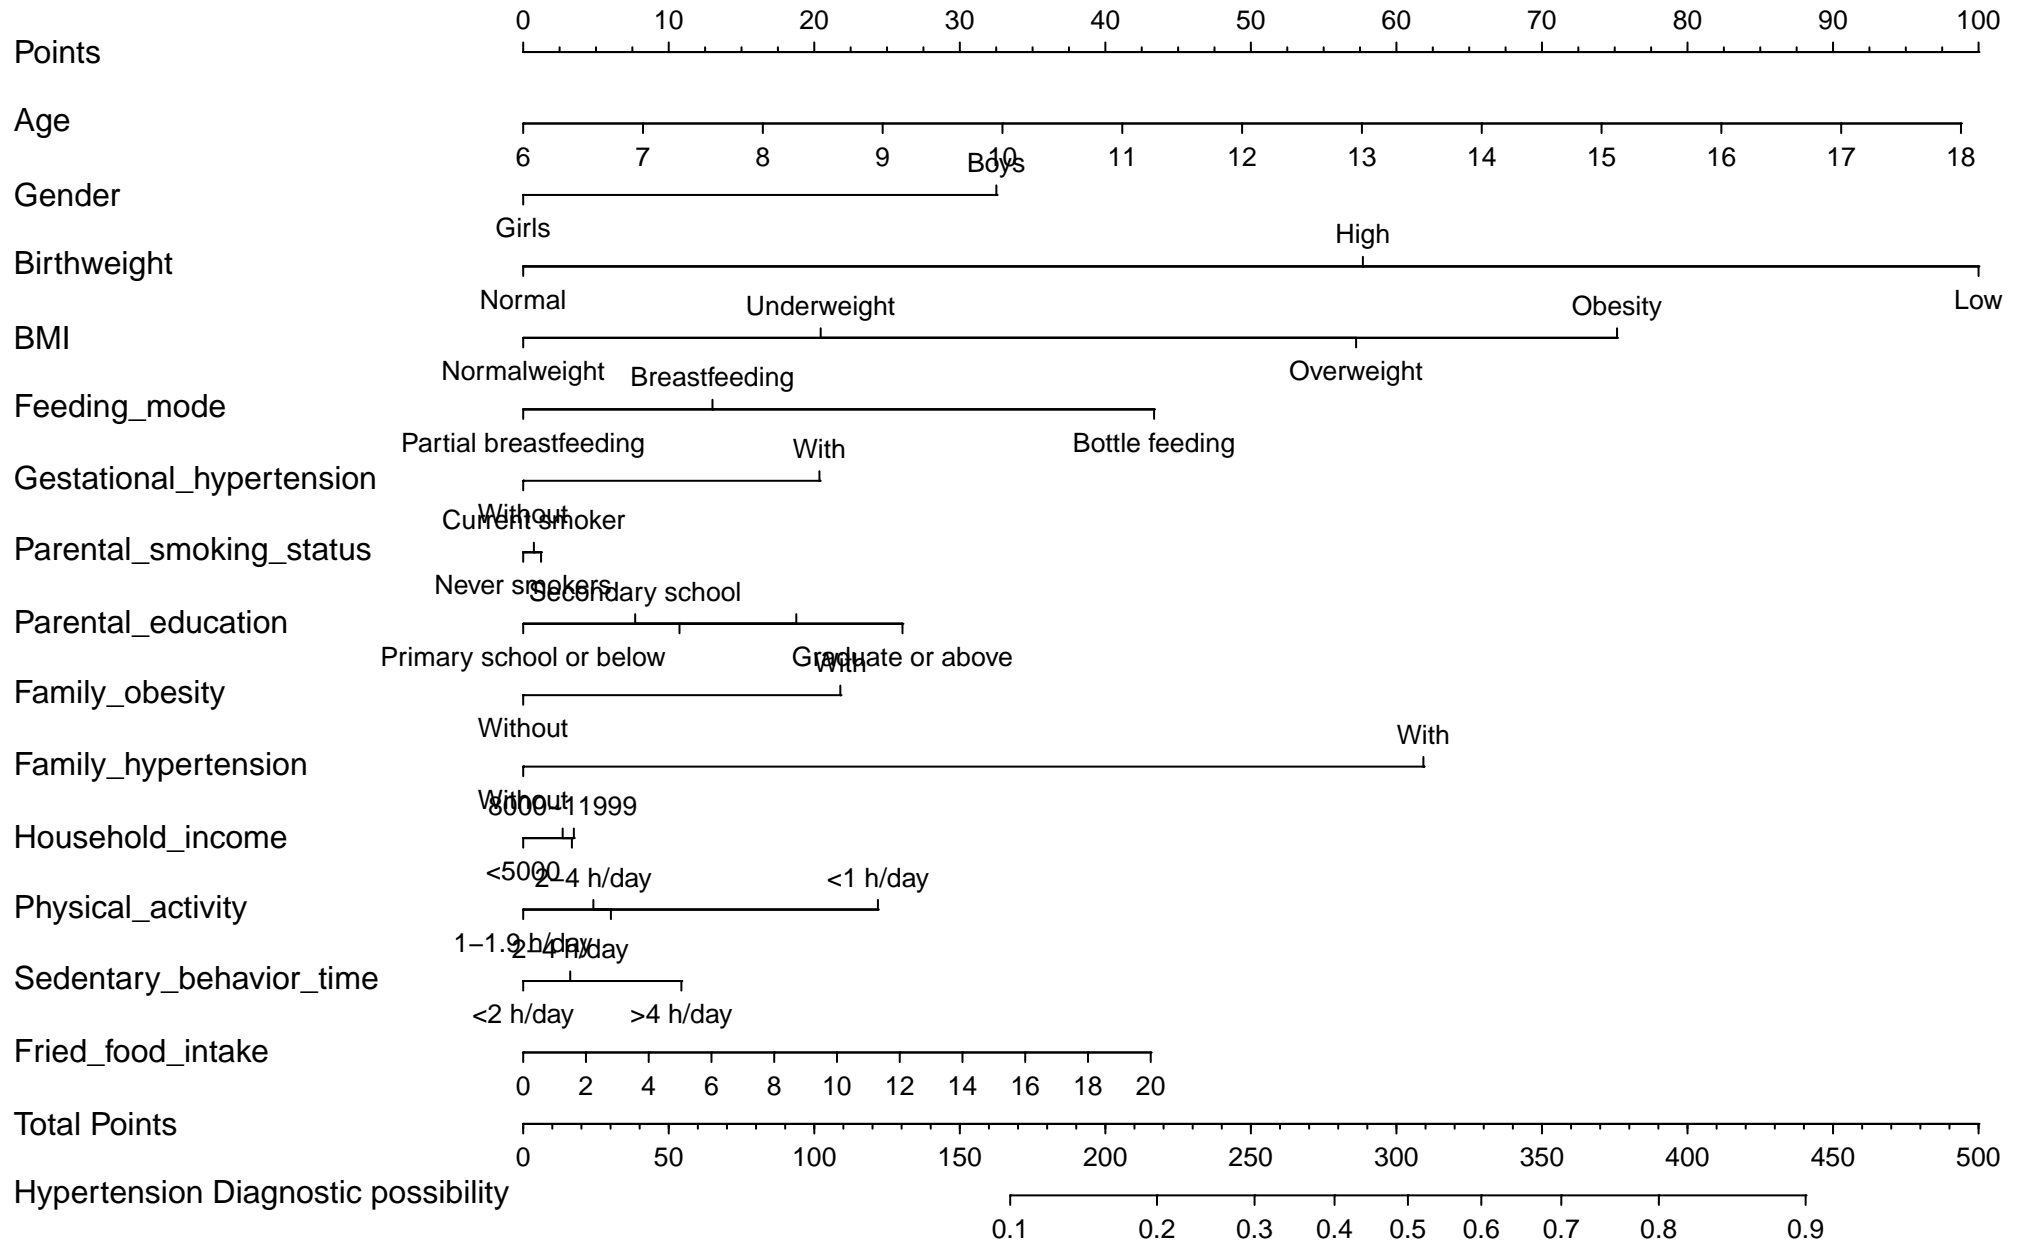

**A**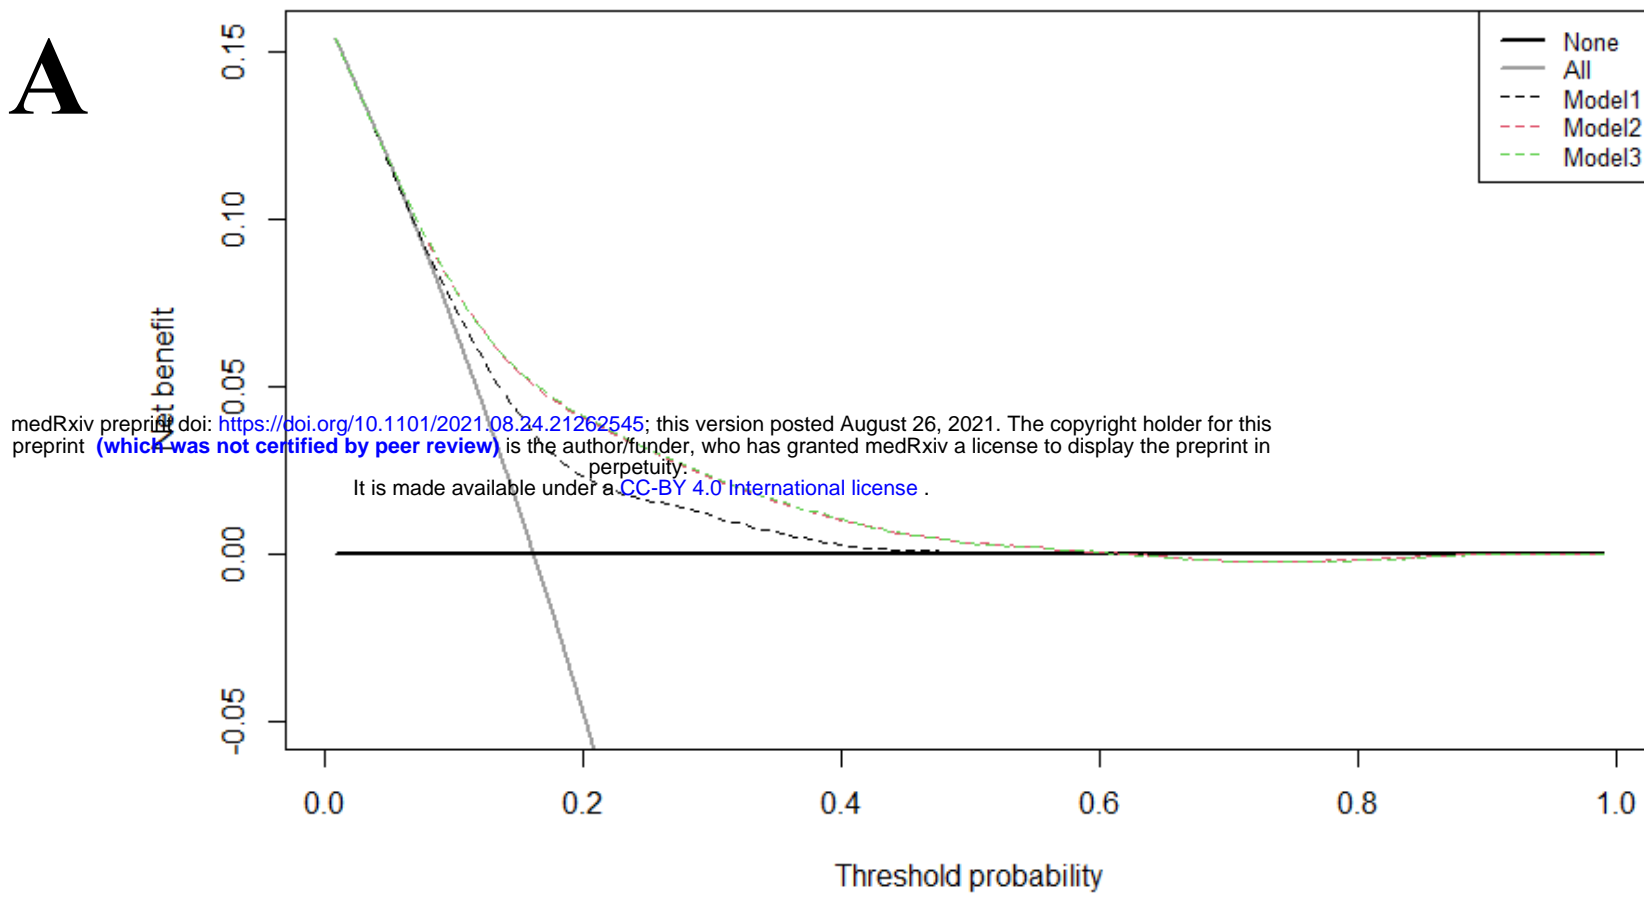**B**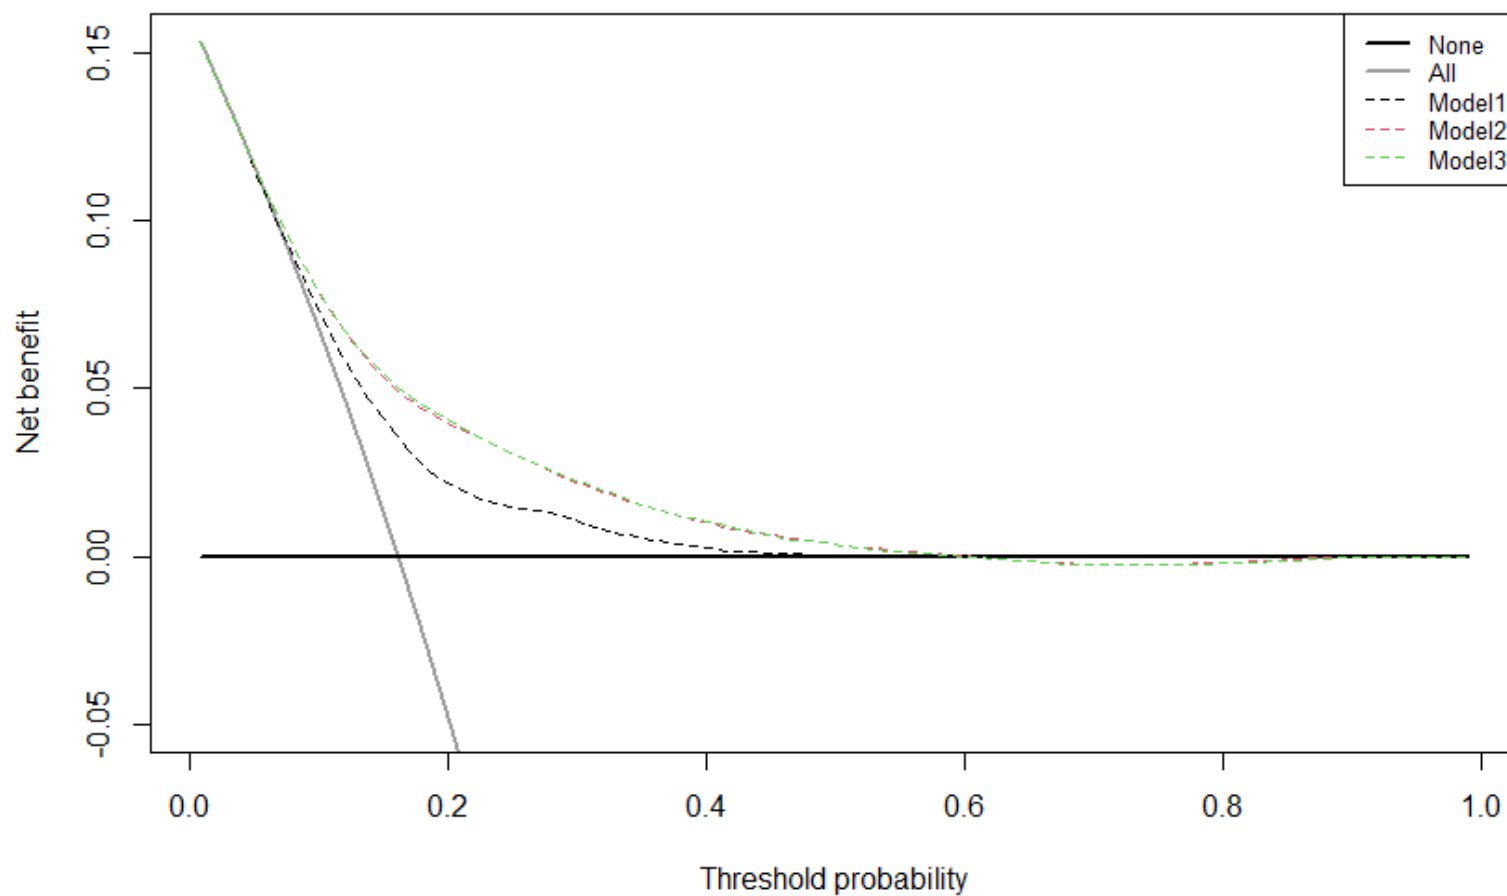

**Supplementary Figure.3 Decision curve analysis of the nomogram prediction in the training group and validation group.**

(A) Decision curve analysis of the nomogram prediction in the training group; (B) Decision curve analysis of the nomogram prediction in the validation group; Model1: Age, gender, gestational hypertension, weight status, family history of hypertension, family history of obesity, average outdoor physical activity time; Model2: Age, gender, gestational hypertension, weight status, family history of hypertension, family history of obesity, average outdoor physical activity time, birthweight, feeding mode; Model3: Age, gender, gestational hypertension, weight status, family history of hypertension, family history of obesity, average outdoor physical activity time, birthweight, feeding mode; parental smoking status, parental education level, household monthly income, average screen-based time, fried food intake.
